# Supplementary material for: Cyberbullying definitions and measurements in children and adolescents: Summarizing 20 years of global efforts
Source: Frontiers journal article supplement (doi:10.3389/fpubh.2022.1000504), 2022-10-25
Supplement: Data_Sheet_1.PDF [file Data_Sheet_1.PDF]

### Appendix 1 Characteristics of the 25 included studies

| N | Title                                                                                                                                                                          | Author, Year                   | Cyberbullying Instrument                                  | Setting                | Sample size | Age                |
|---|--------------------------------------------------------------------------------------------------------------------------------------------------------------------------------|--------------------------------|-----------------------------------------------------------|------------------------|-------------|--------------------|
| 1 | Structural validation and cross-cultural robustness of the European Cyberbullying Intervention Project Questionnaire                                                           | Del Rey et al. 2015            | European Cyberbullying Intervention Project Questionnaire | Six European countries | 5679        | 11 to 23 years old |
| 2 | Bullying and cyberbullying in Polish elementary and middle schools: Validation of questionnaires and nature of the phenomena                                                   | Twardowska-Staszek et al. 2018 | European Cyberbullying Intervention Project Questionnaire | Poland                 | 1052        | 9 to 16 years old  |
| 3 | Bullying and Cyberbullying in Adolescents from Disadvantaged Areas: Validation of Questionnaires; Prevalence Rates; and Relationship to Self-Esteem, Empathy and Social Skills | Martinez et al. 2020           | European Cyberbullying Intervention Project Questionnaire | Peru                   | 607         | 12 to 19 years old |
| 4 | Validation of a Cyber Bullying and Victimization Measure Among Elementary School-Aged Children                                                                                 | Williford et al. 2019          | European Cyberbullying Intervention Project Questionnaire | USA, online survey     | 841         | Grades 3 to 5      |
| 5 | Psychometric properties of the cyberbullying triangulation questionnaire: A prevalence analysis through seven roles                                                            | Gonzalez-Cabrera et al. 2019   | The Cyberbullying Triangulation Questionnaire             | Spain                  | 5036        | 10 to 23 years old |
| 6 | Psychometric properties of the triangulated version of the European Bullying Intervention Project Questionnaire: Prevalence across seven roles                                 | Gonzalez-Cabrera et al. 2020   | The Cyberbullying Triangulation Questionnaire             | Spain                  | 2068        | 11 to 19 years old |
| 7 | The measurement of cyberbullying: dimensional structure and relative item severity and discrimination                                                                          | Ersilia Menesini et al. 2011   | The Florence CyberBullying-CyberVictimization Scales      | Italy                  | 1092        | 11-18 years old    |
| 8 | Psychometric Properties of the Florence CyberBullying-CyberVictimization Scales                                                                                                | Palladino et al. 2015          | The Florence CyberBullying-                               | Italy                  | 1142        | 13 to 20 years old |

| N  | Title                                                                                                                       | Author, Year          | Cyberbullying Instrument                                                 | Setting   | Sample size | Age                |
|----|-----------------------------------------------------------------------------------------------------------------------------|-----------------------|--------------------------------------------------------------------------|-----------|-------------|--------------------|
|    |                                                                                                                             |                       | CyberVictimization Scales                                                |           |             |                    |
| 9  | Measuring bullying victimization, perpetration, and bystander experiences: a compendium of assessment tools                 | Hamburger et al. 2011 | The Cyberbullying and Online Aggression Survey Scale                     | USA       | -           |                    |
| 10 | Cyberbullying Among Adolescents: The Influence of Different Modes of Inquiry                                                | Brochado et al. 2017  | The Cyberbullying and Online Aggression Survey Scale                     | Portugal  | 2624        | Grade 7 to 12      |
| 11 | Developing the Cyber Victimization Experiences and Cyberbullying Behaviors Scales                                           | Betts et al. 2017     | The cyber Victimisation Experiences and Cyber Bullying Behaviours scales | UK        | 393         | 11 to 15 years old |
| 12 | Validation of the Cybervictimization Questionnaire (CYVIC) for adolescents                                                  | David, 2017           | The Cybervictimization Questionnaire                                     | Spain     | 3159        | 12 to 18 years old |
| 13 | Measuring cyberbullying: Implications for research                                                                          | Patchin et al. 2015   | Cyberbullying scale                                                      | USA       | -           |                    |
| 14 | The Development and Validation of the Online Victimization Scale for Adolescents                                            | Tynes et al. 2010     | The Online Victimization Scale                                           | USA       |             | 14 to 19 years old |
| 15 | Development and validation of the Bullying and Cyberbullying Scale for Adolescents: A multi - dimensional measurement model | Thomas, 2019          | The Bullying and cyberbullying Scale for Adolescents                     | Australia | 1217        | 12 to 17 years old |
| 16 | Psychometric properties of the Turkish version of the Bullying and Cyber Bullying Scale for Adolescents (BCS-A)             | Ozbey et al. 2020     | The Bullying and cyberbullying Scale for Adolescents                     | Turkey    | 600         | 12 to 18 years old |
| 17 | Validation of Measures of Cyberbullying Perpetration and Victimization in Emerging Adulthood                                | Lee et al. 2017       | Cyberbullying perpetration (CBP) and                                     | USA       | 286         | 18 to 25 year old  |

| N  | Title                                                                                                  | Author, Year                 | Cyberbullying Instrument                                                                   | Setting       | Sample size | Age                                |
|----|--------------------------------------------------------------------------------------------------------|------------------------------|--------------------------------------------------------------------------------------------|---------------|-------------|------------------------------------|
|    |                                                                                                        |                              | cyberbullying<br>victimization (CBV)                                                       |               |             |                                    |
| 18 | Cyberbullying in adolescents: Modalities and aggressors' profile                                       | Calvete, 2010                | The Cyberbullying<br>Questionnaire                                                         | Spain         | 1431        | 12 to 17<br>years old              |
| 19 | Psychometric Properties of the Cyberbullying Questionnaire (CBQ)<br>Among Mexican Adolescents          | Gamez-Guadix et al. 2014     | The Cyberbullying<br>Questionnaire                                                         | Mexico        | 1491        | 12 to 18<br>years old              |
| 20 | The Development and Psychometric Investigation of the<br>Cyberbullying Scale                           | Stewart et al. 2014          | The Cyberbullying Scale                                                                    | USA           | 736         | 11 to 18<br>years old              |
| 21 | Behavior during cyberbullying episodes: Initial validation of a new<br>self - report scale             | Pozzoli, 2020                | A self-report scale<br>investigating                                                       | Italy         | 561         | 11 to 15<br>years old              |
| 22 | The validation of the E-Victimisation Scale (E-VS) and the E-<br>Bullying Scale (E-BS) for adolescents | Lam et al. 2013              | The E-Victimisation Scale<br>(E-VS) and the E-<br>Bullying Scale (E-BS)<br>for adolescents | China         | 484         | 11 to 16<br>years old              |
| 23 | Bullies Move Beyond the Schoolyard A Preliminary Look at<br>Cyberbullying                              | Patchin and Hinduja,<br>2006 | An Internet-based survey                                                                   | Online survey | 384         | Less<br>than 18<br>years of<br>age |
| 24 | Cyberbullying: Its nature and impact in secondary school pupils                                        | Smith et al. 2008            | A cyberbullying study                                                                      | UK            | 625         | 11 to 16<br>years old              |
| 25 | The emergence of cyberbullying: A survey of primary school pupils'<br>perceptions and experiences      | Monks et al. 2012            | Bullying and<br>cyberbullying<br>questionnaire                                             | UK            | 220         | 7 to 11<br>years old               |
